# Supplementary material for: Density scaling and isodynes in glycerol–water mixtures
Source: Royal Society of Chemistry journal article supplement (doi:10.1039/d4cp02231a), 2024-01-01
Supplement: d4cp02231a1.pdf [file d4cp02231a1.pdf]

## Supplementary Information:

### Density scaling and isodynes in glycerol-water mixtures

David B. Noirat,<sup>1,2</sup> Bernhard Frick,<sup>2</sup> Bo Jakobsen,<sup>1</sup> Markus Appel,<sup>2</sup> and Kristine Niss<sup>1</sup>

<sup>1</sup>*“Glass and Time”, IMFUFA, Department of Science and Environment,  
Roskilde University, Postbox 260, DK-4000 Roskilde, Denmark*

<sup>2</sup>*Institut Laue-Langevin, 71 avenue des Martyrs,  
CS 20156, 38042 Grenoble Cedex 9, France*

$x_{gly} = 0.4 \quad p = 0.1MPa$

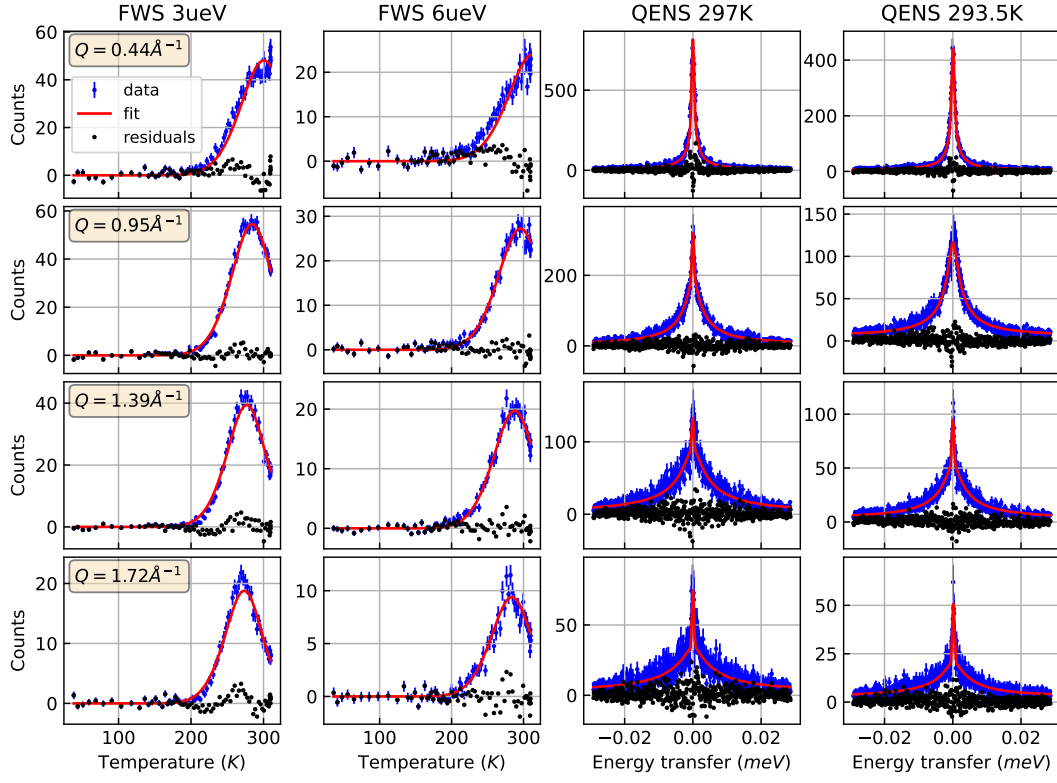

$x_{gly} = 0.4 \quad p = 400MPa$

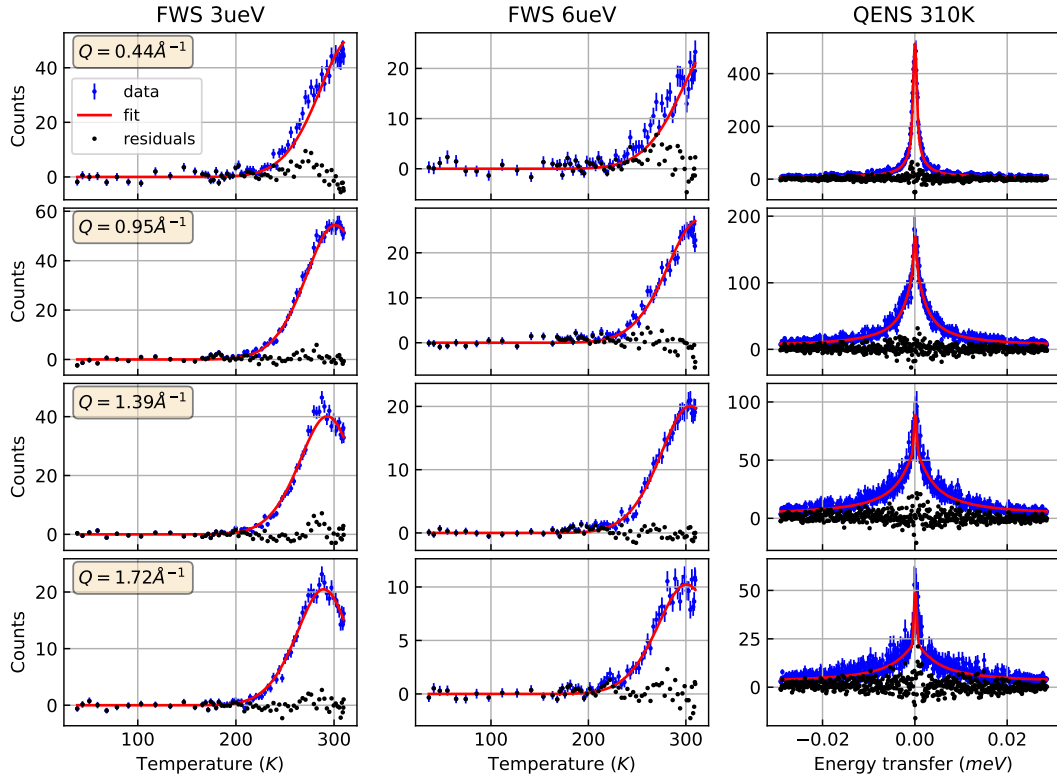

FIG. S1: Data and global fit of neutron spectroscopy data of the  $x_{gly} = 0.4$  sample, showing both fixed window scans (FWS) and energy resolved spectra (QENS) for 4 selected  $Q$ -values at two pressures.

$$x_{gly} = 0.7 \quad p = 0.1MPa$$

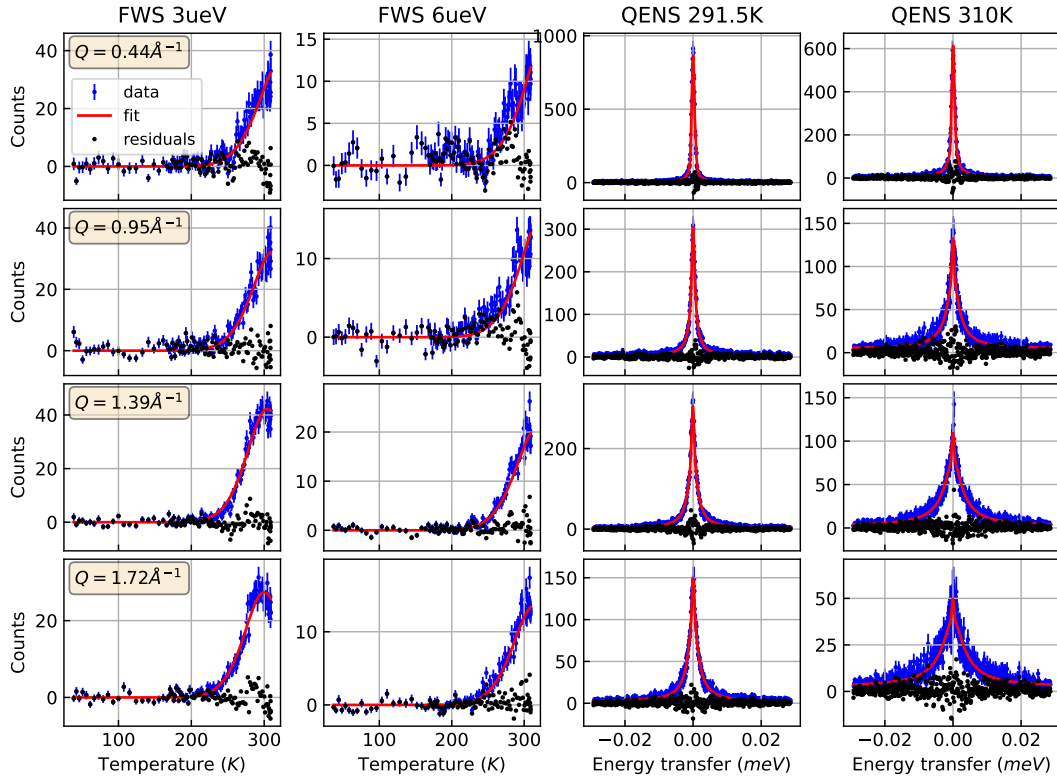

$$x_{gly} = 0.7 \quad p = 400MPa$$

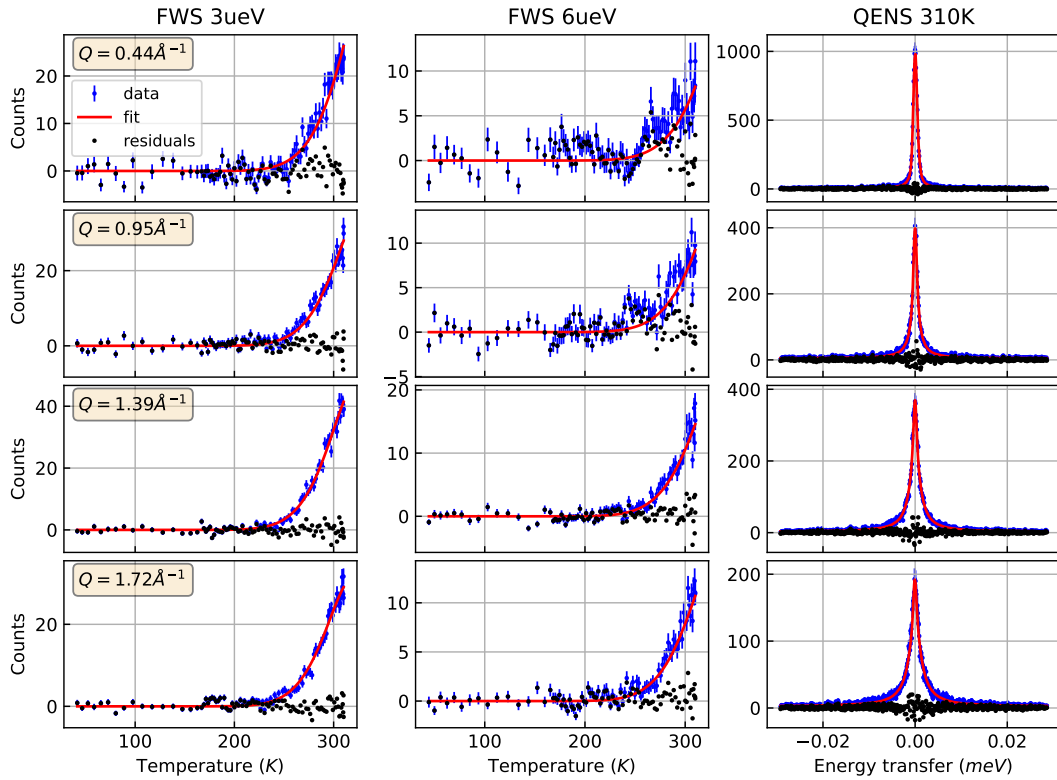

FIG. S2: Data and global fit of neutron spectroscopy data of the  $x_{gly} = 0.7$  sample, showing both fixed window scans (FWS) and energy resolved spectra (QENS) for 4 selected  $Q$ -values at two pressures.

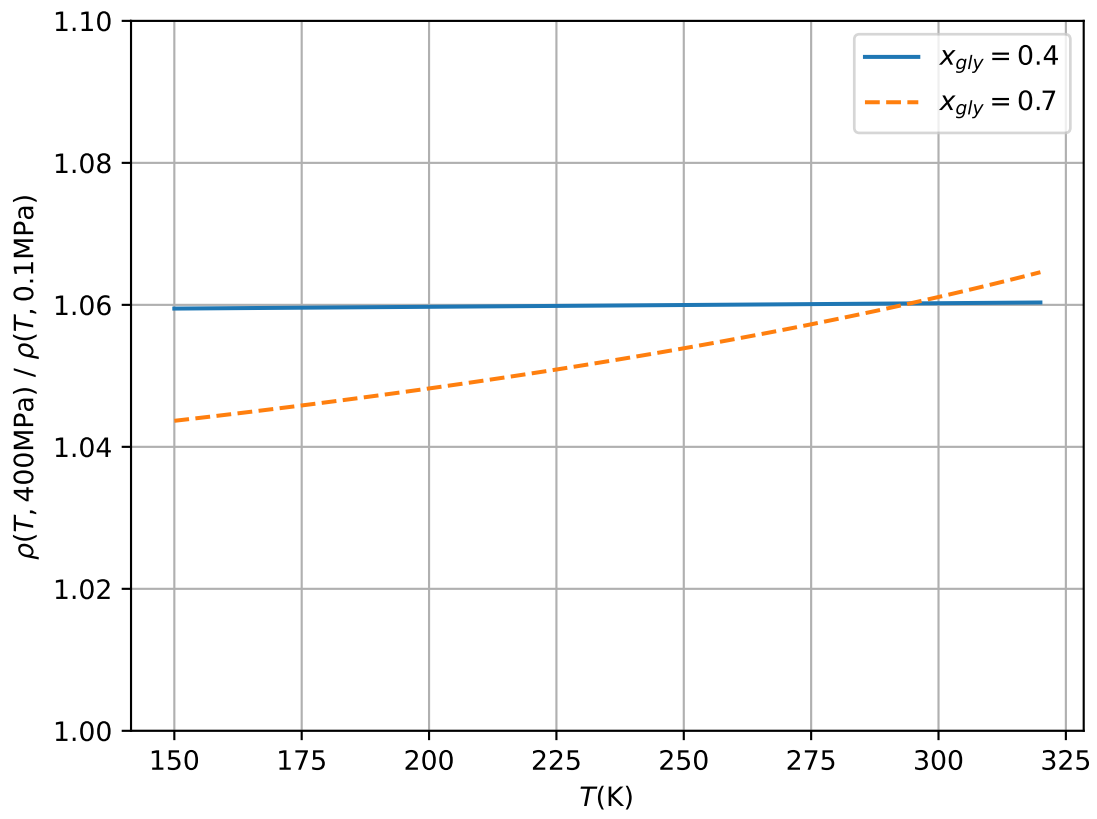

FIG. S3: Density ratio between 400 MPa and 0.1 MPa for the two glycerol-water mixtures investigated in this work, as calculated from the Eq. 1.
